# Supplementary material for: Photoinduced intra- and inter-molecular charge transfer dynamics in organic small molecules with an intra-molecular push–pull electronic structure
Source: Royal Society of Chemistry journal article supplement (doi:10.1039/d2tc01534j), 2022-01-01
Supplement: d2tc01534j1.pdf [file d2tc01534j1.pdf]

# Electronic Supplementary Information

## Photoinduced Intra- and Inter-molecular Charge Transfer Dynamics in Organic Small Molecules with Intra-molecular Push-pull Electronic Structure

Yiwen Ji,<sup>a</sup> Lingxia Xu,<sup>a</sup> Xinyu Mu,<sup>a</sup> Wenjing Wang,<sup>\*b</sup> and Kun Gao<sup>\*a</sup>

<sup>a</sup> School of Physics, State Key Laboratory of Crystal Materials, Shandong University,  
Jinan 250100, China

<sup>b</sup> College of Physics and Electronic Engineering, Qilu Normal University, Jinan  
250200, China

\*Corresponding E-mail: [wwj8686@163.com](mailto:wwj8686@163.com) (Wenjing Wang); [gk@sdu.edu.cn](mailto:gk@sdu.edu.cn) (Kun Gao)

### 1. Parameter details:

In all simulations, unless otherwise specified, the values of model parameters are set as  $t_0=2.5$  eV ,  $\alpha=41.0$  eV/nm ,  $K=2100$  eV/nm ,  $M=1.35\times 10^5$  eV·fs<sup>2</sup>/nm<sup>2</sup> ,  $t_1=t_2=0.05$  eV ,  $t_3=0.1$  eV , and  $U=1.5$  eV . The intra-molecular onsite Coulomb interaction strength  $V_{\parallel}$  and the inter-molecular vertical-neighbor sites Coulomb interaction strength  $V_{\perp}$  are treated as Ohno potentials  $V_{\parallel(\perp)}=U/\sqrt{1+\kappa(r_{\parallel(\perp)}/a)^2}$  with  $\kappa=2$ ,  $r_{\parallel}=a$  , and  $r_{\perp}=3\text{Å}$  ( $\kappa$  is the screening factor,  $a=1.22\text{Å}$  the average nearest-neighbor lattice constant, and  $r_{\perp}$  the inter-molecular distance between vertical-neighbor sites). The inter-molecular electron hopping integral between vertical-

neighbor sites is described as  $t_{\perp} = \frac{t_0}{10} \exp(1 - \frac{r_{\perp}}{5})$ .

## 2. Iteratively solving the static equations:

Considering the electronic eigenstate  $|\varphi_{\mu,s}\rangle$ , we can expand it on the Wannier basis, that is,  $|\varphi_{\mu,s}\rangle = \sum_n Z_{\mu,n,s} |n\rangle$ . As such, the electronic eigenstates are obtained by solving

the eigenequation of the electronic Hamiltonian, written as:

$$\begin{aligned} & \left[ U \left( \rho_{n,n,-s} - \frac{1}{2} \right) + V_{\parallel} \sum_s (\rho_{n+1,n+1} + \rho_{n-1,n-1} - 2) \right] Z_{\mu,n,s} \\ & + [t_3 Z_{\mu,i-3,s} + \Delta_{\text{on}} Z_{\mu,i,s}] \left[ \delta \left( \frac{i-10}{4}, \text{int} \right) + \delta \left( \frac{i-12}{4}, \text{int} \right) \right] \\ & + [t_3 Z_{\mu,i+3,s} + \Delta_{\text{on}} Z_{\mu,i,s}] \left[ \delta \left( \frac{i-7}{4}, \text{int} \right) + \delta \left( \frac{i-9}{4}, \text{int} \right) \right] \\ & - \Delta'_{\text{on}} Z_{\mu,i',s} - t_{n-1,n} Z_{\mu,n-1,s} - t_{n,n+1} Z_{\mu,n+1,s} = \varepsilon_{\mu} Z_{\mu,n,s} \end{aligned} \quad (\text{S1})$$

$i$  and  $i'$  represents the site index of central group and the site index of terminal groups, respectively.  $\delta(x, \text{int})=1$ , if  $x=\text{int}$ ; and  $\delta(x, \text{int})=0$ , if  $x \neq \text{int}$ , where “int” means an integer.

On the other hand, by minimizing the total energy of the molecule, we can obtain the lattice balance equation:

$$u_{n+1} - u_n = \frac{2\alpha}{K} \left( \frac{1}{N-1} \sum_{n,s} \rho_{n,n+1,s} - \sum_s \rho_{n,n+1,s} \right) \quad (\text{S2})$$

where a fixed boundary is employed.  $N$  is the total site number of a NFA molecule.

## 3. The quantum nonadiabatic evolution method:

Before dynamical simulations, we assume that the system is in ground state. Once the femtosecond electric pump pulse (FEPP)  $E(t)$  is turned on, the system will experience an evolution. By using a nonadiabatic evolution method,<sup>1,2</sup> we can

separately obtain the temporal evolution of the electronic state  $\Psi_{v,s}(n,t)$  and the lattice displacement  $u_n(t)$  (i.e., nuclear motion). The evolution of an electronic state  $\Psi_{v,s}(n,t)$  depends on the time dependent Schrödinger equation:

$$\begin{aligned}
i\hbar \frac{\partial \Psi_{v,s}(n,t)}{\partial t} = & -t_{n,n+1} \Psi_{v,s}(n+1,t) - t_{n-1,n} \Psi_{v,s}(n-1,t) \\
& + t_3 \{ \Psi_{v,s}(i+3,t) [\delta\left(\frac{i-7}{4}, \text{int}\right) + \delta\left(\frac{i-9}{4}, \text{int}\right)] \\
& + \Psi_{v,s}(i-3,t) [\delta\left(\frac{i-10}{4}, \text{int}\right) + \delta\left(\frac{i-12}{4}, \text{int}\right)] \} \quad (S3) \\
& + \Delta_{\text{on}} \Psi_{v,s}(i,t) - \Delta'_{\text{on}} \Psi_{v,s}(i',t) + [U\left(\rho_{n,n,s} - \frac{1}{2}\right) \\
& + V_{\parallel} (\rho_{n+1,n+1} + \rho_{n-1,n-1} - 2) + eE(t)] \Psi_{v,s}(n,t)
\end{aligned}$$

$\Psi_{v,s}(n,t) = \langle n | \Psi_{v,s}(t) \rangle$  is the projection of an electronic state  $|\Psi_{v,s}(t)\rangle$  on the Wannier state of site  $n$ . The hopping integrals  $t_{n,n+1}$  between sites  $n$  and  $n+1$  in terminal groups,  $\pi$ -bridges, and central group are separately described as:

$$t_{n,n+1} = \begin{cases} t_0 - \alpha(u_{n+1} - u_n) - t_1 \cos(n\pi/2) & 1 \leq n \leq 7; 29 \leq n \leq 35 \\ t_0 - \alpha(u_{n+1} - u_n) & 8 \leq n \leq 10; 26 \leq n \leq 28 \\ t_0 - \alpha(u_{n+1} - u_n) + (-1)^{n+1} t_2 & 11 \leq n \leq 25 \end{cases} \quad (S4)$$

The density matrix  $\rho_{n,m}$  is defined as:

$$\rho_{n,m}(t) = \sum_{v,s} \Psi_{v,s}^*(n,t) g_{v,s} \sum_{v,s} \Psi_{v,s}(m,t) \quad (S5)$$

Here,  $g_{v,s}$  is a time-independent distribution function and determined by the initial occupation of the electronic state  $|\Psi_{v,s}(t)\rangle$ .

For the lattice part, the nuclear motion is classically described by the Newtonian equation of motion:

$$\begin{aligned}
M\ddot{u}_n = & -K(2u_n - u_{n+1} - u_{n-1}) + 2\alpha[\rho_{n,n+1} - \rho_{n,n-1}] \\
& + eE(t)[\rho_{n,n} - 1] - \lambda M\dot{u}_n \quad (S6)
\end{aligned}$$

Equations S3 and S6 can be numerically solved by the Runge-Kutta method of order

eight with step-size control.<sup>3</sup> In addition, a damping term is introduced in Equation S6 to describe the energy dissipation into the surrounding medium by a tuning a parameter  $\lambda=0.05 \text{ fs}^{-1}$ .

#### 4. Transition details of a single NFA molecule:

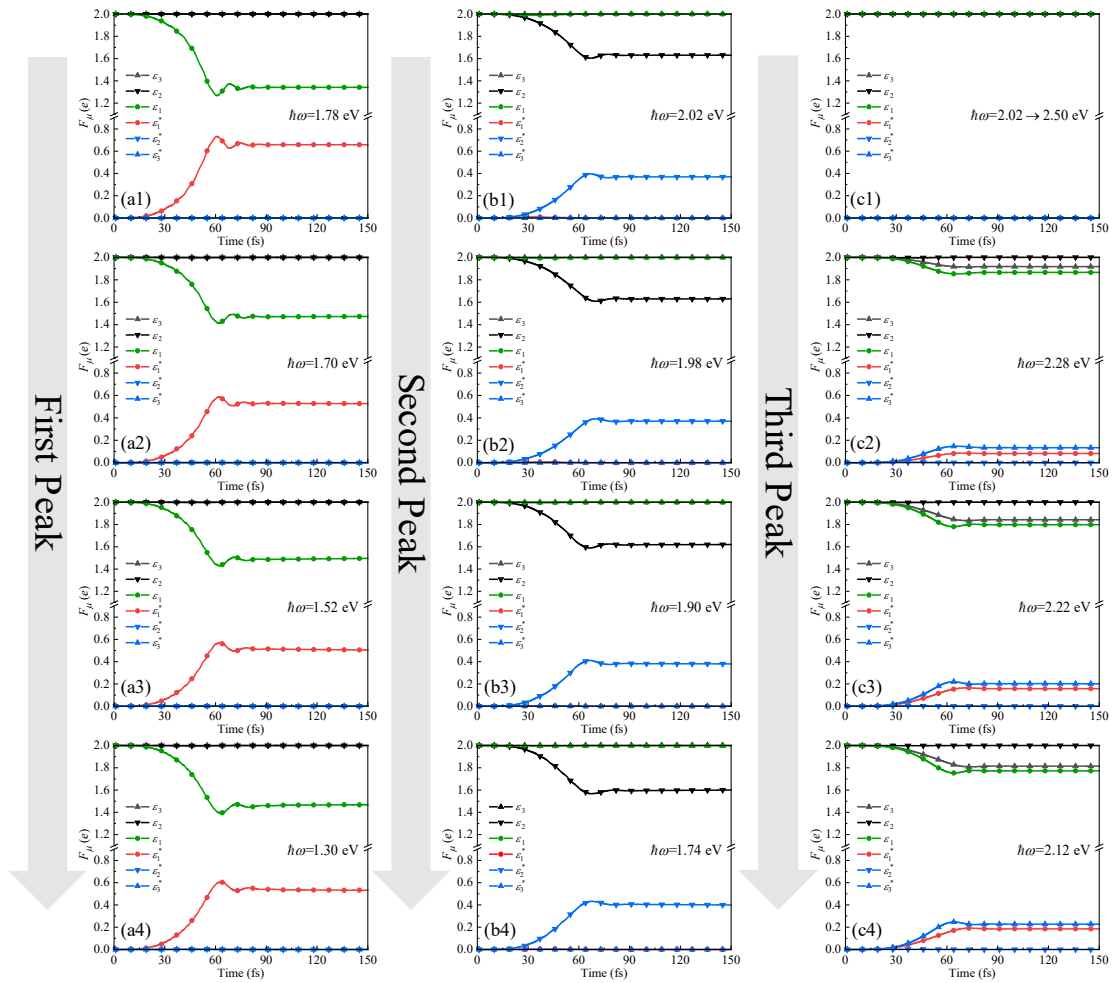

Fig. S1. Time evolutions of the electron occupation number  $F_{\mu}(t)$  on the six band-edge levels in a single NFA molecule by different peak transitions, where the electronic push-pull potentials are separately set as  $\Delta_{\text{on}}=0 \text{ eV}$  (a1-c1),  $\Delta_{\text{on}}=0.3 \text{ eV}$  (a2-c2),  $\Delta_{\text{on}}=0.6 \text{ eV}$  (a3-c3), and  $\Delta_{\text{on}}=0.9 \text{ eV}$  (a4-c4), respectively.

## 5. Selection for the electronic push-pull potential of an actual NFA molecule:

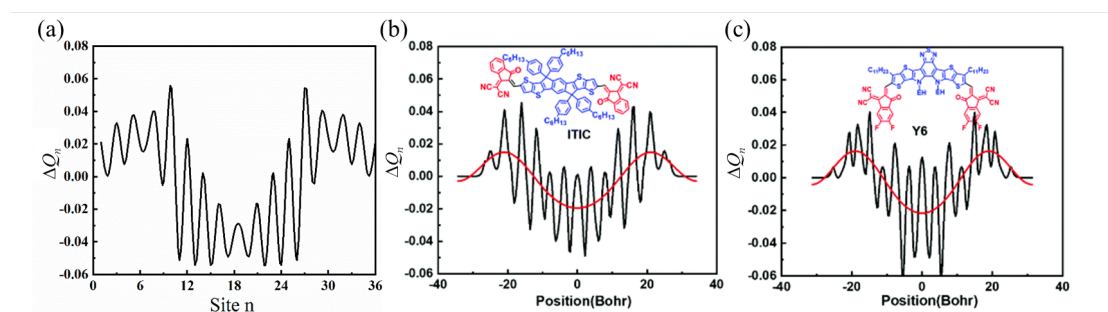

Fig. S2. Charge density difference  $\Delta Q_n$  between the molecular excited state and ground state, separately calculated by model method (a) and Gaussian method (b-c).<sup>4</sup> Reproduced with permission from Chen et al., Chem. Soc. Rev. 49, 2828-2842 (2020). Copyright 2020 The Royal Society of Chemistry.

When the electronic push-pull potential of a NFA molecule is chosen as  $\Delta_{\text{on}}=0.6$  eV, we find that the charge density difference between the excited state and ground state ( $\Delta Q_n = q_{n,\text{excited state}} - q_{n,\text{ground state}}$ , where  $q_n = e(\rho_{n,n} - 1)$ ) calculated by model method (see Fig. S2(a)) is basically consistent with that calculated by Gaussian method (see Fig. S2(b) for ITIC and S2(c) for Y6).<sup>4</sup> Therefore, for an actual ITIC or Y6 molecule, the electronic push-pull potential is estimated to be about  $\Delta_{\text{on}} = 0.6$  eV.

## 6. Higher-energy transition details of different NFA molecular aggregates:

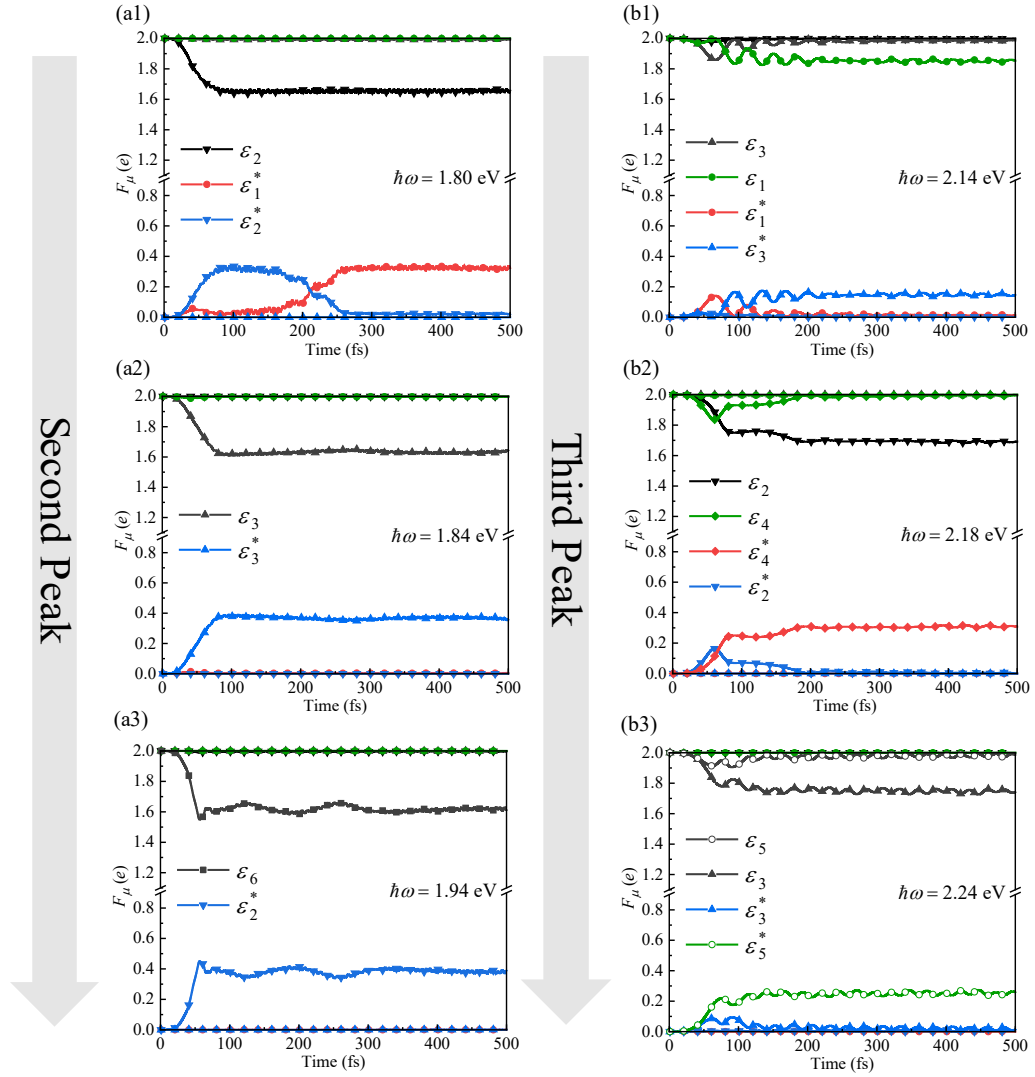

Fig. S3. Time evolutions of the electron occupation number  $F_{\mu}(t)$  on several band-edge levels in NFA molecules with A-to-A type J-aggregation (a1-b1), A-to-D type J-aggregation (a2-b2), and D-to-D type H-aggregation (a3-b3), where the second and third peak transitions are compared.

For the second peak transition, we find that electron transition  $\varepsilon_2 \rightarrow \varepsilon_2^*$  takes place in A-to-A type J-aggregate at the initial photoexcitation stage, soon the transited electron on the higher-energy level  $\varepsilon_2^*$  transits to the lower-energy level  $\varepsilon_1^*$  through an ultrafast internal conversion process (see Fig. S3(a1)). However, for A-to-D type J-

aggregate and D-to-D type H-aggregate,  $\varepsilon_3 \rightarrow \varepsilon_3^*$  and  $\varepsilon_6 \rightarrow \varepsilon_2^*$  takes place (see Figs. S3(a2) and S3(a3)), respectively. For the third peak transition, we find that  $\varepsilon_1 \rightarrow \varepsilon_3^*$  occurs in A-to-A type J-aggregate,  $\varepsilon_2 \rightarrow \varepsilon_4^*$  occurs in A-to-D type J-aggregate, and  $\varepsilon_3 \rightarrow \varepsilon_5^*$  occurs in D-to-D type H-aggregate.

## 7. Effect of the molecular electronic push-pull potential on the inter-CT relaxation process:

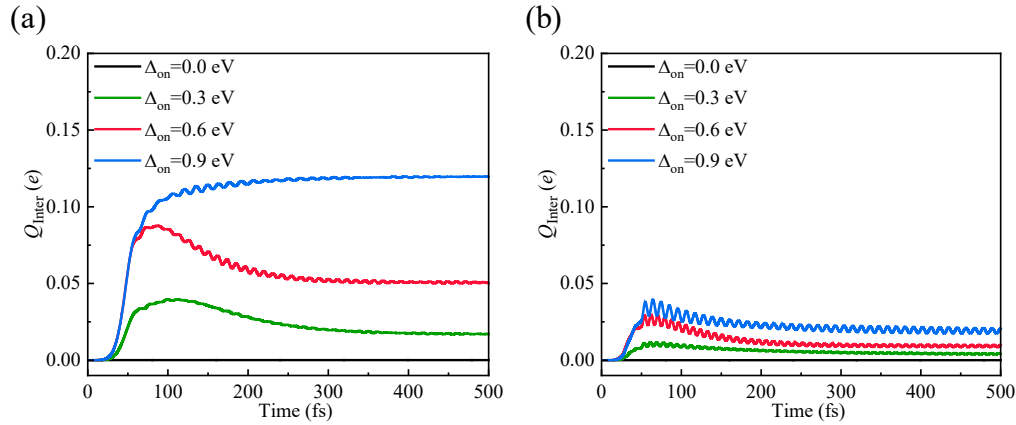

Fig. S4. Time evolutions of the inter-molecular transferred charge quantity  $Q_{\text{inter}}(t)$  for the first peak transition with different values of  $\Delta_{\text{on}}$  in A-to-D type J-aggregate (a) and D-to-D type H-aggregate (b).

## References:

- 1 Z. An, C. Q. Wu, and X. Sun, *Phys. Rev. Lett.* 2004, **93**, 216407.
- 2 Anders A. Johansson and Sven Stafström, *Phys. Rev. B* 2004, **69**, 235205.
- 3 Brankin, R.; Gladwell, I.; Shampine, L. RKSUITE: Software for ODE IVPS.
- 4 X. Wan, C. Li, M. Zhang, and Y. Chen, *Chem. Soc. Rev.* 2020, **49**, 2828.
